# Supplementary material
Source: PubMed Central journal article supplement (PMC2728958)
Supplement: 0903938106_0903938106SI.pdf [file 0903938106_0903938106SI.pdf]

# Supporting Information

Kim et al. 10.1073/pnas.0903938106

## SI Text

**Proton Pumping Against a pH Gradient.** A pH gradient across the membrane provides a driving force for a proton. The proton motive force (PMF)  $\Delta\mu$  across the membrane is then given by

$$\Delta\mu = V_m - 2.303k_B T \Delta\text{pH},$$

where  $V_m$  is the membrane potential while  $\Delta\text{pH} = \text{pH}_P - \text{pH}_N$  is the pH gradient between the P and N sides of the membrane. To explore the effect of the pH gradient on the pumping efficiency in the absence of the membrane potential ( $V_m = 0$ ),  $\Delta\text{pH}$  is incorporated into the rate coefficients involving the proton uptake/release. We assume, for simplicity, that the  $\Delta\text{pH}$  is uniformly distributed among the rates of proton uptake/release for both sides of the membrane. Explicitly, these rates are written as

$$k_{N \rightarrow 1}(\Delta\text{pH}) = k_{N \rightarrow 1}^0 \exp(\Delta\mu/4k_B T), \quad k_{1 \rightarrow N} = k_{1 \rightarrow N}^0 \exp(-\Delta\mu/4k_B T)$$

$$k_{P \rightarrow 2}(\Delta\text{pH}) = k_{P \rightarrow 2}^0 \exp(-\Delta\mu/4k_B T), \quad k_{2 \rightarrow P} = k_{2 \rightarrow P}^0 \exp(\Delta\mu/4k_B T),$$

where, for example,  $k_{N \rightarrow 1}$  is the rate coefficient of the proton uptake from the N side to site, and superscripts 0 denote the rates at zero pH gradient. By using the optimized solutions of the three-site model (Fig. 3 in the main text), we find that protons are pumped against pH gradients  $\Delta\text{pH} \approx -2.5$ , as shown in Fig. S2. The lower limit of  $\Delta\text{pH}$  is thermodynamically equivalent to a proton motive force of  $\approx 150$  mV across the membrane. This value is similar to the maximum membrane potential,  $V_m$ , against which protons are pumped in the absence of a pH gradient.

**Protonation Equilibria and Calculation of  $\text{pK}_a$ .** Proton populations (Fig. 4 of the main text) are obtained by calculating the probability of a proton site  $\mu$  to be occupied. The thermodynamic average of the proton population,  $\langle x_\mu \rangle$ , at equilibrium (without product formation) is given by

$$\langle x_\mu \rangle = \frac{1}{Z} \sum_{i=1}^{2^N} X_\mu^{(i)} \exp(-G_i/k_B T),$$

where the partition function is

$$Z = \sum_{i=1}^{2^N} \exp(-G_i/k_B T).$$

Note that  $X_\mu^{(i)}$  is 0 when site  $\mu$  is empty in state  $i$  and 1 when it is occupied, while  $G_i$  is the free energy of state  $i$ . For a given pH, the free energy  $G_i$  can be written as

$$G_i(\text{pH}) = \sum_{\mu=1}^N X_\mu^{(i)} 2.3k_B T (\text{pH} - \text{pK}_{a,\mu}^{\text{int}}) + \sum_{\mu=1}^{N-1} \sum_{v=\mu+1}^N X_\mu^{(i)} X_v^{(i)} \epsilon_{\mu v},$$

where  $\text{pK}_{a,\mu}^{\text{int}}$  is the intrinsic  $\text{pK}_a$  of the site  $\mu$ , which is related to  $G_\mu^0$  via  $G_\mu^0 = 2.3k_B T (7 - \text{pK}_{a,\mu}^{\text{int}})$ , and  $\epsilon_{\mu v}$  is the electrostatic interaction between sites  $\mu$  and  $v$ . The apparent  $\text{pK}_a$  of the proton site  $\mu$  then corresponds to the pH value that yields  $\langle x_\mu \rangle = \frac{1}{2}$ .

**Midpoint Potential of the Electron Site.** The midpoint potential of the electron site of the kinetic model is equivalent to the experimentally measured midpoint potential of the heme  $a$  relative to either cytochrome  $c$  or  $\text{Cu}_A$ . In the presence of a proton in Glu-242 (i.e., the proton site 1) and the absence of a proton in the pump site, the relative midpoint potential of the electron site is given by

$$\Delta E_m = -25.6(G_3^0 + \epsilon_{13}) \quad [\text{mV}],$$

where  $G_3^0$  is the intrinsic free energy of the site 3, and  $\epsilon_{13}$  is the electrostatic coupling between sites 1 and 3. Results are shown in Fig. S3.

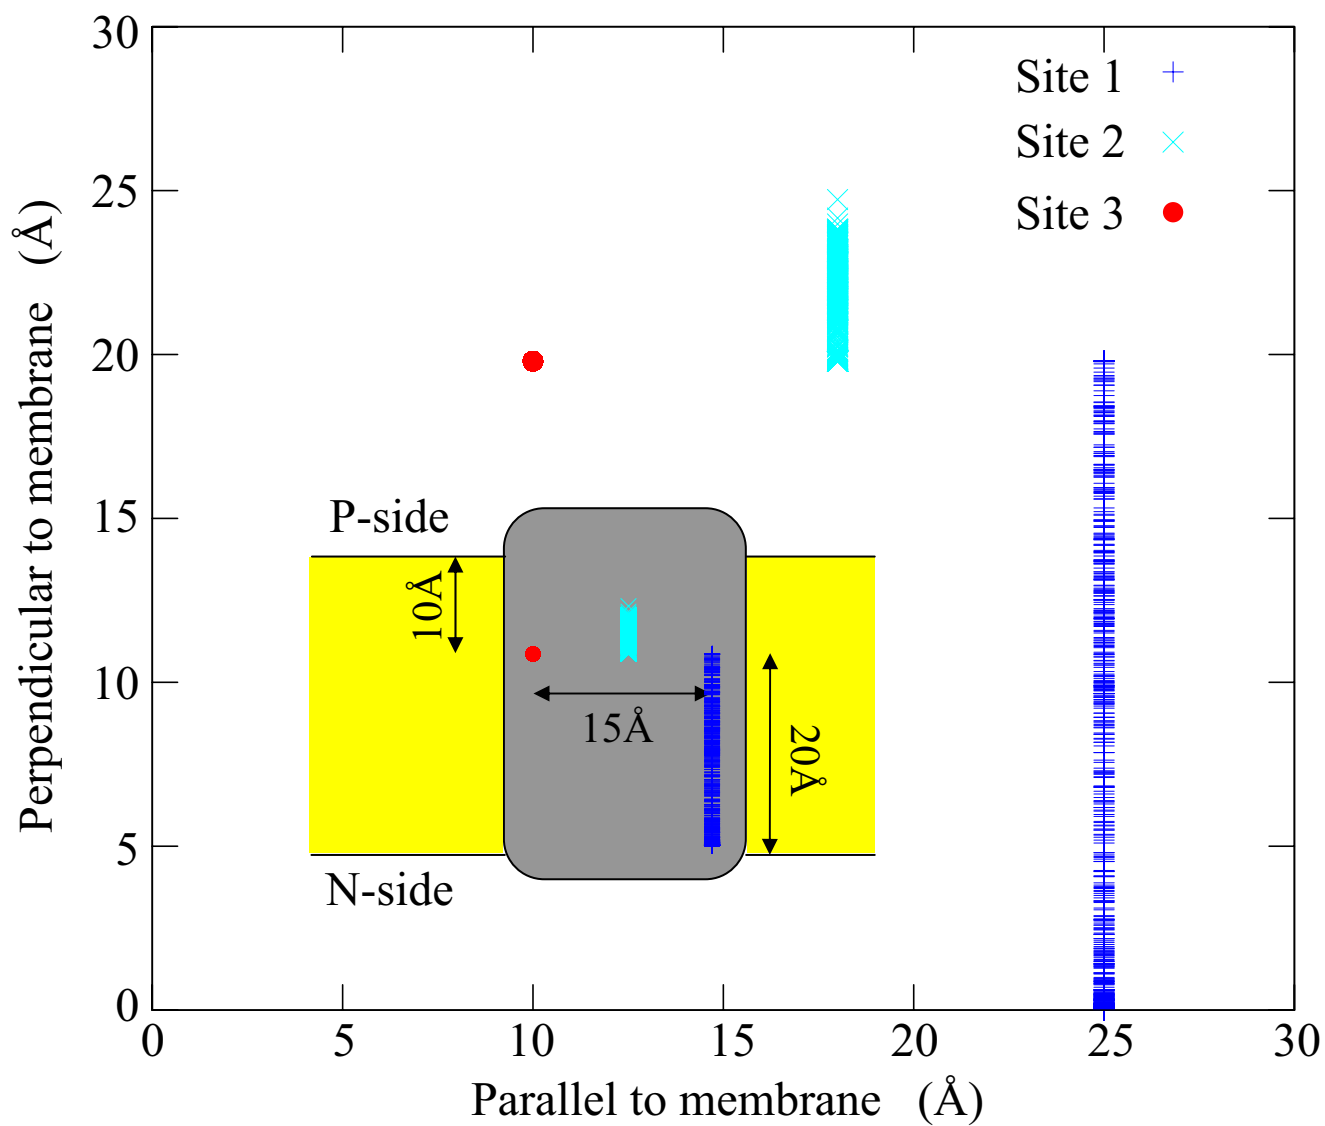

Fig. S1. Coordinates of the proton and electron sites obtained from Monte Carlo optimization of the three-site kinetic models.

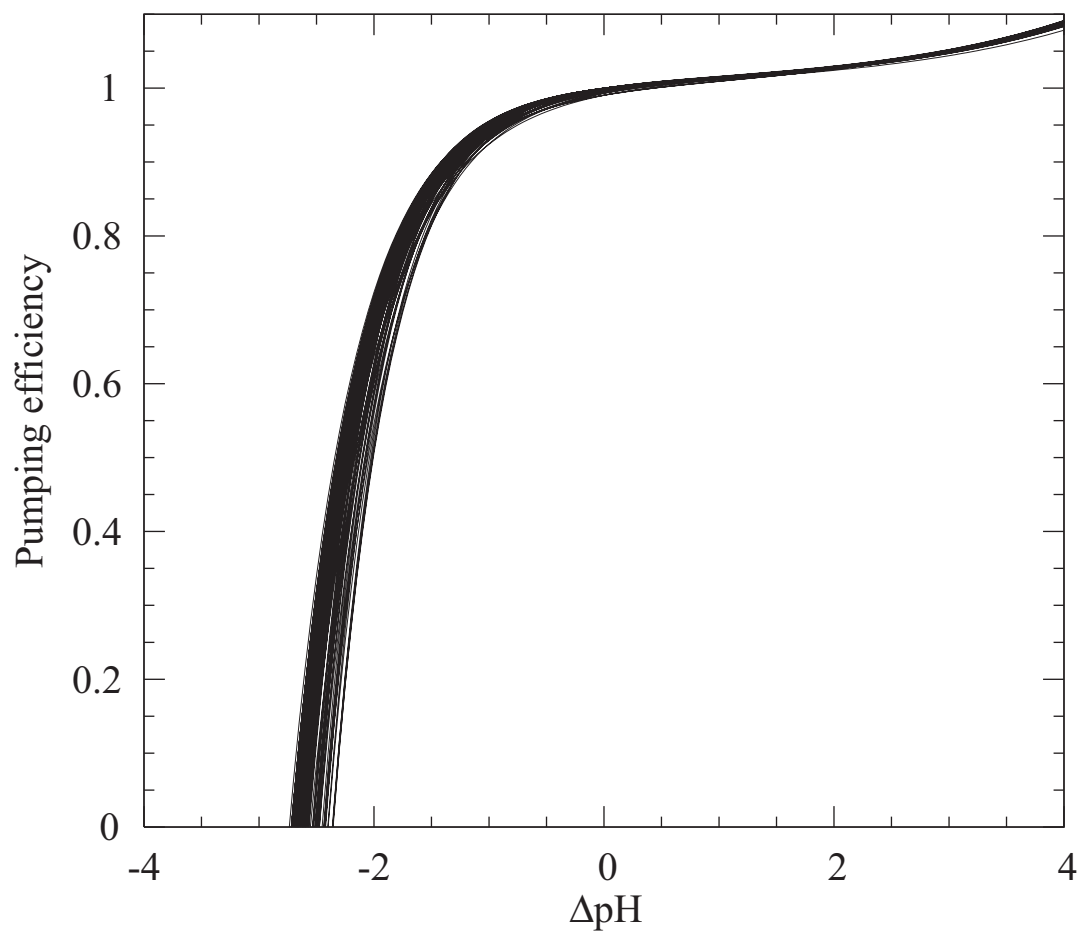

**Fig. S2.** Pumping efficiency as a function of a pH gradient ( $\Delta\text{pH} = \text{pH}_\text{P} - \text{pH}_\text{N}$ ) across the membrane at zero membrane potential ( $V_m = 0$ ) for the optimized proton pumping solutions of the three-site model.

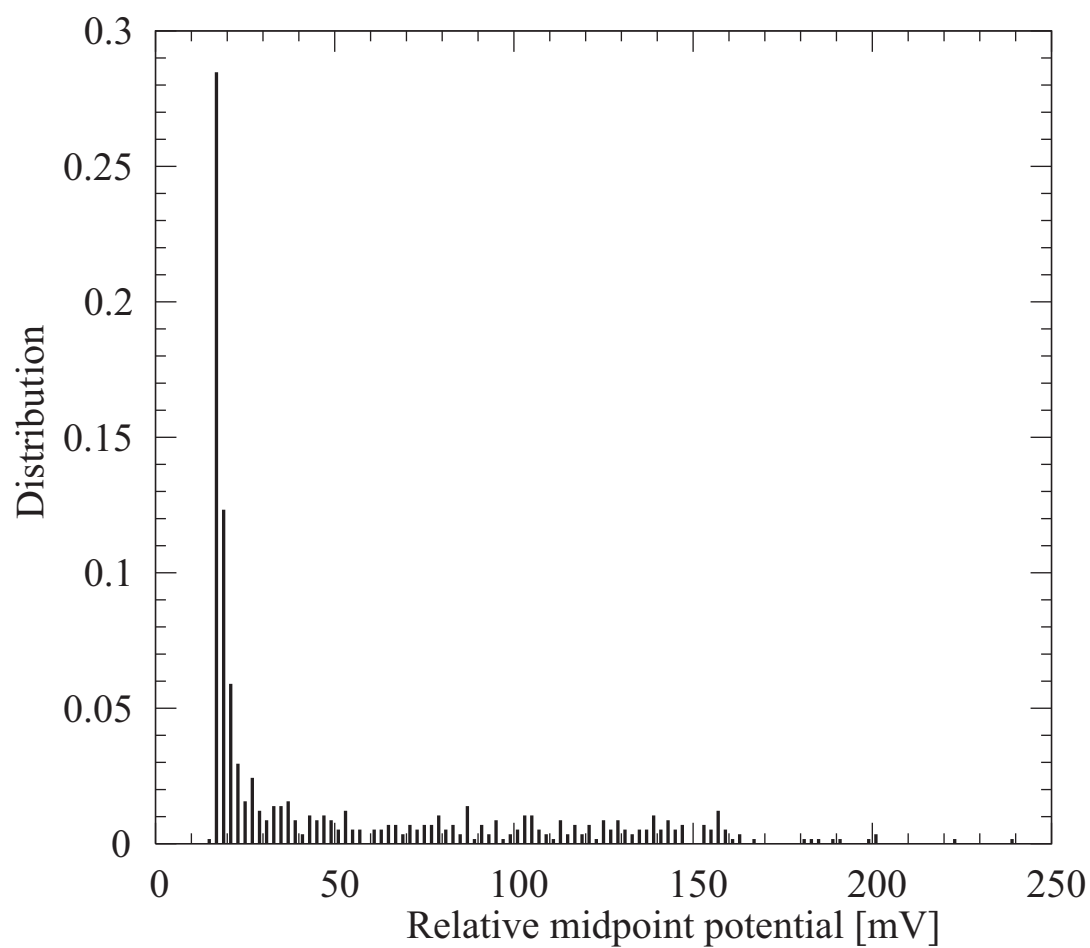

**Fig. S3.** Distribution of the relative midpoint potentials for the electron site 3 with site 1 (Glu-242) protonated and site 2 (pump site) empty.
